# Supplementary material for: Rationally Designing Aptamer Sequences with Reduced Affinity for Controlled Sensor Performance
Source: Sensors (Basel). 2015 Mar 31;15(4):7754–67. doi: 10.3390/s150407754 (PMC4431182; doi:10.3390/s150407754)
Supplement: Supplementary file 1 [file sensors-15-07754-s001.pdf]

## Supplementary Information

# Rationally Designing Aptamer Sequences with Reduced Affinity for Controlled Sensor Performance. *Sensors* 2015, 15, 7754-7767

Lauren R. Schoukroun-Barnes and Ryan J. White \*

Department of Chemistry and Biochemistry, University of Maryland Baltimore County (UMBC),  
1000 Hilltop Circle, Baltimore, MD 21250, USA, E-Mail: SLaur1@umbc.edu

\* Author to whom correspondence should be addressed; E-Mail: rjwhite@umbc.edu;  
Tel.: +1-410-455-3053.

**Table S1.** All of the lowest energy secondary structures for the novel aminoglycoside aptamer sequence. All of the structures were determined by using MFOLD and were done based on the aptamer in a 1 M NaCl solution at 25 °C [1,2].

| Sequence Name | Secondary Structure Prediction | Folding Energy (kcal/mol) |
|---------------|--------------------------------|---------------------------|
| 7UG           |                                | −0.64                     |
| 7UC           |                                | −0.64                     |

Table S1. Cont.

| Sequence Name | Secondary Structure Prediction | Folding Energy (kcal/mol) |
|---------------|--------------------------------|---------------------------|
| 16GU          |                                | −2.13                     |
| 3-UAC         |                                | −1.60                     |

## References

1. Zuker, M. Mfold web server for nucleic acid folding and hybridization prediction. *Nucleic Acids Res.* **2003**, *31*, 3406–3415.
2. Zuker, M.; Jacobson, A.B. Using reliability information to annotate RNA secondary structures. *RNA* **1998**, *4*, 669–679.

© 2015 by the authors; licensee MDPI, Basel, Switzerland. This article is an open access article distributed under the terms and conditions of the Creative Commons Attribution license (<http://creativecommons.org/licenses/by/4.0/>).
